# Supplementary material for: Urban–rural differences in perception of trees described by parents bringing up children in Warsaw and Jedlińsk, Poland
Source: PeerJ. 2020 Apr 8;8:e8875. doi: 10.7717/peerj.8875 (PMC7150541; doi:10.7717/peerj.8875)
Supplement: Supplemental Information 2 [file peerj-08-8875-s002.xlsx]

## Sheet: Arkusz1
No.	Make urbanized environment more pleasant to live, work and spend leisure time	Modify microclimate	Drop flowers and dirt the area around them	Significantly improve air quality	Reduce rate of storm water runoff	Drop branches and seeds and dirt the area around them	Contribute to road accidents	Improve physical health	Cause danger on playgrounds (and therefore should be removed)	Look beautiful in the autumn	Improve psychological health	Reduce noise Are an escape from the hustle and bustle of the city, help people relax and calm down Reduce noise Are an escape from the hustle and bustle of the city, help people relax and calm down Reduce noise	Are an escape from the hustle and bustle of the city, help people relax and calm down	Destroy road surface by roots	The presence of trees soothes nerves and stress	ograniczają widok z okien Limit the view from the windows of apartments and houses	Building stronger sense of community	Limit the access of light	Are a threat to human security due to fragile branches	Looking beautiful while blooming	Reduce crime	Bring the world of nature closer	Improve the aesthetics of the house and the environment	They are a cover for criminal activities	Provide shade on buildings sunny days	Control wind	In areas with trees, drivers are more careful and reduce speed	They attract unwanted insects	Extend the life of the surface	Provide shade on buildings sunny days	Help to save energy	Trees increase the value of the property on which they are located	Litter the area around through falling leaves	Cause allergies	They are a desirable habitat for many important life around me organisms	Provide privacy	Costs of maintaining mature trees overwhelm their benefits	Drip sap or sticky residue on parked cars	Old, damaged trees are visually unattractive	It pays to plant trees (e.g. profit from energy saving)	Cover unpleasant views	Have a positive impact on children's development	Are you trying to protect children from trees (prohibiting climbing trees, touching rotten parts, playing with leaves, branches?	Gender 1- female, 2 - male	Age (1) under 30 (2) 30-45 (3) 46-60 (4) over 60	Education (1) Primary school (2) High school (3) Higher education	Place of origin (1) village (2) city	Place of residence 1) village 2) city
1	7	7	5	6	5	5	2	4	1	7	5	5	5	5	5	4	5	3	2	7	4	6	7	1	5	5	6	3	4	7	4	7	4	4	6	5	1	2	4	5	5	6	6	2	1	3	1	1
2	7	7	3	7	7	1	4	7	2	7	7	6	7	2	7	5	5	3	5	7	3	7	7	3	7	7	4	4	4	7	7	4	2	6	7	7	1	2	6	7	5	7	4	1	1	3	1	1
3	7	7	3	7	6	2	3	7	6	7	7	7	7	3	7	3	6	5	5	7	4	7	7	4	6	6	5	5	5	7	5	5	5	5	7	6	3	5	5	6	6	6	5	2	2	3	1	1
4	7	7	6	7	4	3	3	7	2	7	7	7	7	4	7	5	4	5	5	7	4	6	6	3	3	3	5	3	5	7	4	4	5	6	6	3	4	5	3	4	6	7	5	1	2	2	1	1
5	5	6	6	7	4	3	5	5	6	7	6	6	6	5	7	7	7	7	5	6	6	7	6	4	7	6	2	4	6	7	7	6	6	6	6	7	7	6	5	4	7	6	3	1	3	2	1	1
6	6	6	2	7	4	2	2	4	3	7	6	6	7	4	6	3	4	5	6	7	1	6	5	4	7	1	4	4	4	7	3	4	5	4	4	3	4	3	5	4	3	5	2	1	2	2	1	1
7	7	7	3	7	7	3	5	7	3	7	7	7	7	3	7	5	4	3	3	7	4	7	7	3	7	7	6	5	5	7	7	7	3	5	5	7	3	3	3	7	7	7	1	1	2	3	1	1
8	6	6	3	7	5	3	5	5	5	7	7	7	7	7	7	7	4	6	6	7	2	7	7	6	6	6	6	6	4	7	7	6	6	6	7	6	3	5	5	6	6	7	1	1	2	3	1	1
9	7	7	2	7	2	2	5	7	2	7	7	7	2	2	7	2	7	2	4	7	4	7	7	1	7	7	7	2	7	7	7	7	2	2	7	7	2	2	2	7	7	7	2	1	2	3	1	1
10	6	6	2	7	7	2	3	4	3	7	5	5	6	3	6	3	4	3	3	7	4	6	6	4	5	5	5	5	4	6	5	4	3	5	6	6	2	2	2	5	5	6	5	1	2	2	1	1
11	6	6	3	6	3	3	3	5	3	6	6	6	6	3	6	3	4	5	5	6	1	5	5	4	5	4	5	4	3	6	4	5	3	4	4	5	2	3	4	5	5	5	5	1	2	2	1	1
12	5	5	5	5	4	4	3	6	2	6	6	6	6	4	7	5	4	5	4	7	4	6	6	4	4	6	5	4	4	7	4	4	6	5	6	3	4	5	5	4	6	5	3	1	2	2	1	1
13	6	6	4	6	4	3	3	6	3	6	7	6	7	3	7	3	4	5	5	7	4	5	6	4	5	7	7	5	4	7	7	7	6	5	7	4	5	6	6	6	6	7	2	1	2	2	1	1
14	5	6	2	7	4	2	5	6	3	7	5	4	7	4	5	6	3	4	6	6	4	5	6	4	5	5	5	6	5	6	2	4	3	6	4	5	4	5	3	6	6	5	2	2	2	2	1	1
15	6	6	3	6	7	6	2	6	2	6	6	6	6	5	6	6	4	3	3	6	4	6	6	4	6	6	4	3	3	6	5	4	3	6	5	6	4	3	5	5	5	5	6	1	2	2	1	1
16	7	6	2	6	6	3	3	7	2	7	7	6	7	5	7	4	3	3	3	7	4	6	6	4	7	7	4	4	4	7	6	7	3	4	4	7	3	3	3	4	7	7	4	1	2	3	1	1
17	6	6	2	7	6	3	1	7	1	7	7	6	7	5	7	2	2	2	2	7	1	7	7	1	7	7	5	2	3	7	4	1	3	3	3	7	2	2	2	6	6	6	4	1	2	3	2	1
18	6	7	2	6	4	5	2	6	6	7	7	7	6	5	6	7	6	5	6	7	3	4	7	4	6	7	6	7	2	7	3	5	6	6	7	7	3	5	6	7	6	6	2	1	2	2	1	1
19	5	4	5	4	4	4	2	4	3	6	4	4	5	4	5	6	4	5	5	5	4	5	5	4	5	5	4	5	4	6	4	5	5	5	4	3	4	5	3	4	4	4	4	1	2	2	1	1
20	6	6	3	7	3	3	3	5	5	7	5	5	6	3	5	3	4	3	3	7	4	6	6	4	6	4	5	6	4	7	4	4	4	4	4	5	1	5	5	1	5	5	5	1	2	3	1	1
21	7	7	2	7	3	1	1	7	1	7	7	7	7	2	7	3	7	2	2	7	1	7	7	1	6	6	6	3	5	7	1	7	5	1	7	3	3	3	5	6	6	7	6	1	2	2	1	1
22	6	7	2	7	4	3	3	7	4	7	7	7	7	3	7	2	4	3	4	7	4	7	6	2	5	5	3	5	4	6	4	5	2	4	7	6	3	2	2	6	6	7	6	1	2	3	1	1
23	7	6	1	7	5	1	1	4	7	7	6	6	7	3	6	3	3	5	2	7	2	6	5	3	5	5	5	3	3	7	3	3	3	3	7	6	3	2	6	3	6	7	6	1	2	2	1	1
24	7	6	2	6	4	3	2	6	2	7	7	6	7	3	6	2	4	1	2	7	1	6	6	1	4	5	3	3	4	6	3	3	3	6	4	5	1	2	5	4	6	6	6	1	2	3	1	1
25	7	7	2	7	4	1	1	7	1	7	7	6	7	3	7	1	4	2	2	7	4	7	7	2	6	1	2	4	7	4	4	1	6	6	6	4	2	1	1	4	6	7	2	1	2	2	1	1
26	7	7	4	7	4	4	1	7	1	6	7	6	7	4	7	5	4	4	1	7	4	7	7	4	2	6	6	3	6	4	4	6	1	1	7	4	2	4	6	3	4	7	5	1	2	2	1	1
27	7	6	1	7	5	1	1	4	7	7	6	6	7	2	6	2	2	5	2	7	2	6	5	3	5	5	5	3	3	7	3	3	3	3	7	6	3	2	6	3	6	7	6	2	3	2	1	1
28	7	7	7	7	7	7	6	6	3	7	4	7	7	3	7	5	5	5	5	7	5	6	7	7	7	7	6	4	4	7	7	4	3	5	4	7	4	4	2	5	7	7	2	1	3	2	1	1
29	6	6	2	6	6	3	3	6	6	6	6	6	3	6	4	6	3	4	6	4	4	6	6	4	6	2	6	6	6	6	6	6	3	4	6	4	3	3	3	6	6	6	5	1	2	2	1	1
30	6	6	1	6	6	1	5	6	5	6	6	6	6	1	6	5	6	5	2	6	4	6	6	3	6	6	2	6	6	3	4	5	6	6	6	3	3	1	2	4	6	6	5	1	2	3	1	1
31	5	5	3	6	5	4	4	6	2	6	5	5	6	4	6	5	4	4	3	6	4	6	6	4	6	6	5	3	2	6	4	4	3	5	5	6	4	3	3	4	5	5	6	1	2	3	1	1
32	6	6	2	6	4	3	3	5	2	6	6	6	6	2	6	2	6	2	2	6	4	6	6	2	6	6	6	2	4	6	4	4	2	5	6	6	2	2	5	6	6	6	5	1	2	3	2	1
33	6	6	3	6	4	4	6	6	4	6	6	5	6	4	6	3	4	3	5	6	2	6	6	4	6	3	4	5	4	6	4	4	3	6	5	5	4	3	3	4	5	6	3	1	2	2	1	1
34	7	6	6	7	7	3	6	7	5	7	6	7	5	4	6	7	7	6	5	6	4	6	5	4	6	6	6	5	4	7	5	6	6	4	5	5	5	7	5	5	7	6	1	2	4	1	1	1
35	7	7	2	7	7	1	3	7	2	7	7	7	7	2	7	3	6	2	3	7	4	4	7	4	7	6	5	2	4	7	6	6	3	4	6	6	2	2	5	5	6	7	5	1	2	3	1	1
36	7	2	5	7	7	3	1	2	7	3	7	7	6	7	4	6	4	2	2	5	1	6	6	1	4	5	1	4	4	7	4	5	3	4	4	3	4	3	5	5	6	5	2	1	2	3	1	1
37	1	7	2	6	4	6	5	6	3	7	7	6	7	5	7	2	6	3	3	7	4	7	7	3	5	5	4	4	3	7	4	4	3	5	5	5	3	3	3	4	5	5	5	1	2	2	1	1
38	6	6	2	6	3	2	6	6	2	6	6	6	6	6	6	2	6	6	6	6	4	6	6	3	6	6	6	6	4	6	6	6	6	4	6	6	6	6	6	6	6	6	2	2	2	2	1	1
39	6	6	3	6	6	4	3	5	2	6	6	4	7	4	6	5	4	3	4	7	4	6	6	4	6	6	5	5	3	7	4	4	3	5	3	5	4	5	5	6	6	6	6	1	2	3	2	1
40	7	7	1	7	7	1	1	7	1	7	7	7	7	1	7	1	7	1	1	7	4	7	7	4	7	7	5	3	4	7	7	4	2	2	6	7	4	2	2	7	7	7	6	1	2	3	1	1
41	6	5	3	7	4	2	5	6	2	7	7	6	7	3	7	3	4	3	3	7	3	5	6	3	6	6	4	3	7	4	4	3	6	6	6	4	3	3	6	6	6	6	5	1	2	3	1	1
42	7	7	2	7	7	5	3	7	3	7	7	7	7	4	7	3	4	3	5	7	4	6	7	3	6	6	5	3	4	7	4	6	3	2	7	7	1	3	3	4	5	6	6	2	2	3	1	1
43	6	7	3	7	4	1	3	7	3	7	7	5	7	3	5	2	5	3	3	7	3	7	6	3	6	5	6	5	4	7	2	5	2	4	4	6	1	2	2	6	6	7	2	1	2	2	1	1
44	5	7	3	7	1	3	4	7	4	7	7	3	5	5	6	6	4	4	5	7	1	7	7	5	6	5	3	4	4	7	3	3	3	5	5	5	3	3	6	1	5	5	7	1	2	3	1	1
45	2	3	3	4	4	4	3	4	5	5	5	4	4	5	3	3	3	3	5	5	3	4	4	3	5	5	4	5	4	5	2	3	3	4	4	4	4	5	5	4	4	4	2	1	3	2	1	1
46	7	7	2	7	2	2	2	6	2	6	7	6	7	2	7	2	5	3	2	6	4	6	6	4	5	6	5	5	4	7	4	6	3	5	6	6	1	3	5	6	4	6	3	1	2	2	1	1
47	7	7	1	5	6	1	1	6	1	7	7	5	7	3	7	1	4	1	3	7	1	7	7	1	7	7	4	3	3	7	4	5	6	5	7	7	1	1	5	4	5	7	6	2	2	3	1	1
48	5	5	5	5	4	4	3	6	2	6	6	6	6	4	7	5	4	5	4	7	4	6	6	4	4	6	5	4	4	7	4	4	6	5	6	3	4	5	5	4	6	5	3	1	2	2	1	1
49	7	7	3	7	6	3	2	7	2	7	7	6	7	3	7	3	7	3	5	7	3	7	7	4	4	4	3	2	6	7	4	7	2	6	7	6	6	3	6	7	7	7	1	1	2	3	1	1
50	6	6	1	6	5	2	3	5	1	7	7	7	6	3	6	2	2	1	2	7	3	7	6	2	3	6	4	5	6	7	4	5	1	4	3	5	1	2	2	7	4	6	0	1	1	2	1	1
51	7	7	6	7	4	5	6	7	5	7	7	7	7	4	7	1	4	5	5	7	1	7	7	5	7	6	4	5	4	7	7	7	6	7	7	7	4	6	7	6	6	7	1	1	2	3	1	1
52	7	7	5	7	4	4	5	5	5	5	5	5	5	4	5	5	4	5	4	6	4	6	5	6	6	4	4	4	4	6	4	4	5	5	4	6	4	4	5	6	6	4	7	1	2	3	1	1
53	7	7	2	7	7	1	1	7	1	7	7	6	7	1	7	2	5	2	3	7	7	7	7	1	7	7	7	1	4	7	7	7	1	5	7	7	1	1	1	7	7	7	0	1	1	3	2	2
54	7	7	2	7	7	3	2	6	1	7	7	7	7	3	7	2	7	1	3	7	6	7	7	5	7	5	5	6	4	7	4	7	1	4	7	6	6	2	2	7	7	7	0	1	1	3	2	2
55	6	6	2	5	6	3	3	4	1	7	6	5	6	5	6	3	4	3	3	5	3	6	6	3	5	5	3	5	4	6	6	6	3	5	6	6	2	3	2	6	6	6	0	2	1	2	2	2
56	7	7	3	7	6	1	2	1	2	7	7	7	7	3	7	2	6	2	3	7	3	6	7	3	4	5	5	4	4	7	4	7	3	5	7	7	1	2	5	6	6	7	0	1	1	3	2	2
57	7	7	3	7	7	2	3	7	1	7	7	6	7	5	7	3	6	4	3	6	4	7	7	6	7	6	6	4	4	7	4	7	3	5	7	7	1	3	1	6	6	7	0	1	1	3	2	2
58	6	6	3	6	4	3	3	6	2	6	6	4	6	3	6	2	4	2	3	6	2	6	6	4	3	3	3	2	2	6	2	5	5	5	6	3	3	5	2	6	6	6	6	1	2	3	2	2
59	7	7	1	6	6	1	4	6	3	7	7	5	7	5	7	4	3	4	4	7	4	7	7	5	6	5	3	5	4	6	4	4	3	6	5	5	7	1	1	7	7	7	5	1	2	3	2	2
60	6	6	2	6	4	3	1	6	2	7	6	5	6	3	6	3	4	2	2	6	4	7	6	4	5	5	4	3	4	7	4	5	1	4	6	5	1	1	1	5	5	6	7	1	2	3	2	2
61	7	6	2	7	4	1	3	6	2	6	6	5	7	2	6	4	5	2	3	6	4	7	6	3	6	5	4	3	4	7	4	5	2	3	7	5	2	2	3	6	6	7	5	2	1	3	2	2
62	7	7	3	7	3	6	6	1	1	7	5	6	7	1	7	1	1	3	2	7	1	7	6	1	6	5	1	1	2	7	2	6	2	2	4	6	2	1	6	7	7	6	7	1	2	3	2	2
63	6	7	2	5	4	2	2	6	2	7	7	7	7	3	6	2	4	2	2	7	2	6	6	2	4	6	4	5	4	6	4	4	2	6	4	3	4	2	2	6	6	7	0	1	1	2	2	2
64	7	7	1	7	6	5	5	5	6	7	7	7	7	3	7	3	5	3	5	7	4	6	7	3	5	6	3	3	4	6	5	4	5	5	5	6	6	3	3	7	7	7	2	1	2	3	2	2
65	6	7	4	6	4	3	3	5	2	6	3	4	2	5	2	5	4	6	3	6	2	6	6	3	4	6	6	4	3	4	6	3	3	4	6	6	6	2	2	6	7	7	6	1	2	3	2	2
66	7	7	1	7	7	7	1	7	1	7	7	7	7	1	7	1	7	1	1	7	4	7	7	4	7	7	4	1	7	7	4	4	1	6	7	7	1	1	1	4	7	7	5	1	3	3	2	2
67	7	4	3	6	4	4	5	3	3	7	2	4	5	7	4	6	2	5	4	6	7	6	4	7	4	5	4	7	4	6	4	5	6	4	4	3	4	7	7	4	3	4	7	2	1	1	2	2
68	7	7	6	7	7	6	1	5	1	7	7	7	7	5	7	1	4	3	3	7	4	7	7	1	7	6	2	2	2	7	4	6	6	5	6	6	1	6	1	6	6	7	7	1	2	3	2	2
69	7	7	1	7	4	5	1	7	1	7	7	6	7	2	7	3	4	3	2	7	4	6	6	4	5	6	3	4	4	7	4	3	2	2	6	6	1	1	5	6	4	7	2	1	2	3	2	2
70	7	7	3	6	4	5	1	2	1	7	7	6	7	5	7	6	3	4	3	7	1	7	7	5	7	6	3	6	1	7	1	5	6	3	7	6	2	5	6	4	7	5	6	1	2	3	2	2
71	4	4	5	5	4	5	3	3	3	5	3	6	5	3	4	2	1	3	5	5	1	5	5	3	4	5	4	5	2	7	4	3	5	5	5	5	2	5	3	4	7	5	6	1	1	1	2	2
72	7	7	2	5	6	2	3	6	3	7	7	4	7	4	7	3	4	5	4	7	4	7	7	3	6	4	3	4	4	7	4	4	3	4	5	5	3	3	3	4	5	5	0	1	1	2	2	2
73	6	5	3	6	4	5	3	2	1	7	4	5	7	5	4	3	2	2	5	7	1	6	6	5	4	5	5	6	2	7	4	5	3	2	3	5	3	5	5	6	6	4	5	1	1	2	2	2
74	4	5	3	6	4	4	4	6	3	4	6	4	5	4	5	6	4	6	4	4	4	5	5	4	4	4	4	5	4	6	5	5	3	4	4	5	4	4	5	5	5	5	6	2	1	1	2	2
75	7	7	2	6	6	5	3	5	2	7	6	5	6	2	7	3	4	2	2	7	2	6	6	2	5	5	3	5	3	6	3	5	5	3	4	5	2	3	2	5	5	6	5	2	2	3	2	2
76	7	7	1	6	5	1	3	5	4	7	5	5	5	1	5	4	5	4	5	7	4	7	5	5	4	5	5	5	6	4	5	2	1	3	7	7	3	7	1	7	7	7	7	1	1	1	2	2
77	7	7	1	7	4	2	3	4	1	7	7	3	7	2	7	3	6	1	2	7	1	7	7	3	7	5	7	4	6	7	7	7	1	6	7	7	1	1	3	7	7	7	7	1	1	2	2	2
78	7	7	3	7	7	5	2	6	1	7	7	7	7	3	7	1	4	3	3	7	4	7	7	3	7	7	6	2	6	7	5	7	2	3	7	7	2	2	3	4	7	7	6	2	2	3	2	2
79	7	7	7	4	4	4	4	4	4	4	3	5	5	4	4	6	6	6	6	5	4	6	5	6	6	6	6	1	7	7	7	7	7	7	6	5	4	6	4	6	4	4	7	2	4	3	2	2
80	6	7	4	7	7	4	3	7	2	6	6	6	7	5	7	2	4	2	5	7	4	7	7	2	6	6	5	4	4	7	6	4	3	3	4	7	4	3	5	6	6	7	0	1	1	2	2	2
81	7	7	3	7	4	3	7	7	4	7	7	4	7	4	7	2	3	3	6	7	1	7	7	1	7	4	1	4	1	7	4	4	7	7	7	7	1	3	2	4	4	7	0	1	1	2	2	2
82	7	7	5	6	4	5	3	6	2	7	5	5	6	3	7	6	2	3	3	6	1	5	6	2	5	5	2	7	2	4	5	5	5	3	5	2	5	3	6	6	6	6	7	2	3	3	2	2
83	7	7	1	7	5	2	3	7	2	7	7	6	7	2	7	2	7	2	2	7	2	7	7	2	2	2	5	5	2	7	7	6	2	6	6	6	2	2	5	7	6	7	6	1	2	3	2	2
84	6	6	1	6	6	1	3	5	4	7	7	6	7	5	6	5	3	5	5	7	1	6	5	3	5	6	3	3	4	7	3	5	5	1	5	6	2	5	5	4	1	5	5	1	2	3	2	2
85	7	7	2	7	3	6	1	7	2	7	7	7	7	6	7	6	4	2	3	7	4	7	7	4	6	4	6	6	4	7	6	4	6	3	7	7	1	5	1	7	7	7	7	1	2	3	2	2
86	7	7	2	7	6	2	1	7	1	7	7	7	7	1	7	2	7	2	1	7	4	7	7	2	7	7	7	4	4	7	7	7	1	2	4	7	1	1	2	7	4	7	5	2	2	3	2	2
87	7	7	2	7	4	3	2	3	2	7	6	6	7	3	6	3	3	3	2	6	1	6	6	3	6	5	2	4	4	7	2	3	3	3	2	5	2	2	5	5	5	4	7	1	2	3	2	2
88	6	6	5	5	6	2	2	6	2	7	7	5	6	2	7	4	5	4	3	6	4	6	6	4	5	5	4	4	4	7	4	5	3	2	6	6	2	2	4	4	6	6	6	2	2	3	2	2
89	7	7	2	7	2	5	2	7	2	7	7	7	7	6	7	5	7	5	3	7	4	7	7	3	6	5	5	3	4	7	4	4	3	6	6	6	2	3	2	7	4	7	6	1	2	3	2	2
90	7	7	3	6	4	2	5	5	1	7	6	6	7	3	7	3	4	3	2	6	2	6	6	3	5	5	3	2	2	7	4	3	3	5	7	6	1	3	3	5	6	6	6	1	2	3	2	2
91	6	6	1	7	2	2	5	6	2	7	7	6	7	3	7	4	4	5	4	7	4	6	6	4	4	5	4	4	4	7	4	4	3	5	5	5	4	3	3	4	5	6	5	1	2	2	2	2
92	7	7	1	7	1	1	1	7	1	7	7	7	7	1	7	1	7	1	1	7	1	7	7	1	7	7	7	1	1	7	7	7	1	1	7	7	1	1	1	7	7	7	5	1	2	2	2	2
93	6	6	2	7	6	2	3	6	3	7	7	6	7	5	7	2	4	3	3	7	4	7	7	2	6	6	3	3	3	7	5	4	2	5	6	6	2	2	5	6	6	7	2	1	3	3	1	2
94	7	7	4	2	7	2	3	7	1	7	7	7	7	5	7	3	6	5	1	7	4	7	7	4	7	7	5	4	3	7	4	7	3	7	7	7	1	1	1	4	7	7	4	1	2	3	2	2
95	7	7	3	7	4	3	7	7	3	7	7	7	7	3	7	3	4	3	4	7	4	7	7	5	7	7	1	3	4	7	4	4	1	5	7	7	3	3	7	4	7	7	3	1	3	3	2	2
96	3	5	5	6	4	3	3	4	6	6	5	4	5	5	4	6	4	6	6	7	3	5	3	4	6	6	6	6	4	7	2	4	6	6	6	5	6	6	5	4	5	3	2	1	3	2	1	2
97	7	7	1	7	4	2	1	6	1	7	7	7	7	2	7	2	4	4	4	7	4	7	7	4	5	6	4	4	4	7	6	7	3	4	6	6	4	3	5	6	6	6	3	1	2	3	2	2
98	7	7	1	7	4	1	1	7	2	7	7	7	7	2	7	1	5	2	2	7	1	6	7	3	6	6	6	1	4	1	3	3	1	6	7	6	1	1	6	4	7	7	3	1	3	3	2	2
99	7	7	7	5	6	5	3	6	4	7	6	4	7	4	7	1	4	3	4	7	4	7	6	5	5	5	6	5	4	6	6	4	5	6	6	6	4	6	6	6	6	7	3	1	2	3	2	2
100	7	7	2	7	6	2	1	7	1	7	7	7	7	1	7	2	7	2	1	7	4	7	7	2	7	7	7	4	4	7	7	7	1	2	4	7	1	1	2	7	4	7	5	1	2	3	2	2
101	7	7	3	7	3	6	6	1	1	7	5	6	7	1	7	1	1	3	2	7	1	7	6	1	6	5	1	1	2	7	2	6	2	2	4	6	2	1	6	7	7	6	7	1	2	3	1	2
102	7	7	6	7	4	5	5	7	5	7	7	7	7	5	7	5	7	5	5	7	4	7	7	4	7	7	5	4	7	4	7	6	5	7	7	5	5	5	7	4	7	7	2	1	2	3	2	2
103	7	7	2	7	5	2	1	6	1	6	5	6	7	2	6	2	3	2	2	6	4	7	6	4	5	5	5	4	4	7	4	5	5	7	6	7	6	3	1	4	7	7	7	1	2	3	2	2
104	7	7	1	7	7	7	3	7	1	7	7	7	7	5	7	3	4	3	2	7	1	7	7	4	7	7	7	1	4	7	7	7	1	4	7	7	1	1	1	7	7	7	7	1	1	3	2	2
105	7	7	1	7	1	1	1	7	1	7	7	7	7	1	7	1	7	1	1	7	4	7	7	1	7	7	1	1	4	7	4	7	1	6	7	7	1	7	1	7	7	7	5	1	2	2	2	2
106	7	7	1	7	4	2	2	7	1	7	6	6	7	2	6	1	4	3	3	7	5	6	6	4	6	6	4	4	4	6	4	6	1	6	6	6	1	1	2	5	5	6	6	2	2	3	2	2
107	6	6	4	7	4	4	4	6	4	7	6	5	6	4	6	5	4	5	6	7	4	6	6	4	5	5	4	5	4	6	5	5	5	5	6	6	3	5	4	5	5	6	4	1	2	3	1	2
108	7	7	3	7	3	2	2	7	1	7	7	7	7	3	7	2	7	2	4	7	4	7	7	4	4	5	4	5	4	6	4	7	2	5	7	7	1	1	2	5	7	7	0	1	1	2	1	2
109	7	7	1	7	6	6	2	5	2	7	6	5	7	5	7	6	4	5	5	7	4	6	7	4	5	6	5	2	1	7	5	6	5	5	7	7	2	6	5	5	5	6	7	2	2	3	2	2
110	7	7	5	7	6	5	4	6	6	7	5	6	7	6	6	7	3	6	7	7	1	7	6	7	4	5	5	6	3	5	4	5	7	7	4	7	5	6	4	1	7	7	6	2	2	2	2	2
111	7	7	2	7	6	2	5	7	1	7	7	7	7	1	7	1	4	3	2	6	4	7	7	4	7	7	4	3	4	7	5	6	2	6	6	6	2	2	2	7	2	7	3	2	2	3	2	2
